# Supplementary material for: Distinct Temporal Structure of Nicotinic ACh Receptor Activation Determines Responses of VTA Neurons to Endogenous ACh and Nicotine
Source: eNeuro. 2020 Aug 21;7(4):ENEURO.0418-19.2020. doi: 10.1523/ENEURO.0418-19.2020 (PMC7470928; doi:10.1523/ENEURO.0418-19.2020)
Supplement: Table 1-1 — Model parameters. Download Table 1-1, DOCX file. [file enu-eN-NWR-0418-19-s04.docx]

Table 1-1: Model parameters

| **Parameter** | **Description** |  | **Value** |
| --- | --- | --- | --- |
|  | Membrane capacitance | |  |
|  | Potassium conductance | |  |
|  | Calcium conductance | |  |
|  | Calcium-dependent potassium conductance | |  |
|  | Subthreshold sodium conductance | |  |
|  | Leak conductance | |  |
|  | Potassium reversal potential | |  |
|  | Calcium reversal potential | |  |
|  | Sodium reversal potential | |  |
|  | Leak reversal potential | |  |
|  | NMDA reversal potential | |  |
|  | AMPA reversal potential | |  |
|  | GABA reversal potential | |  |
|  | AMPA receptor activation time | |  |
|  | AMPA receptor deactivation time | |  |
|  | AMPA receptor desensitization time | |  |
|  | AMPA receptor release from desensitization time | |  |
|  | NMDA receptor activation time | |  |
|  | NMDA receptor deactivation time | |  |
|  | GABA receptor activation time | |  |
|  | GABA receptor deactivation time | |  |
